# Supplementary material
Source: PubMed Central journal article supplement (PMC6546371)
Supplement: krnb-16-06-1585738-s001.pdf [file krnb-16-06-1585738-s001.pdf]

**Supplement Figure 1**

**PANC-1 cell lysate  
Melt Peak**

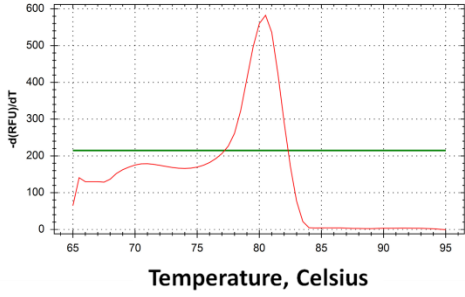

**miR-1246 mimics with lysis buffer  
(12 hour incubate)  
Melt Peak**

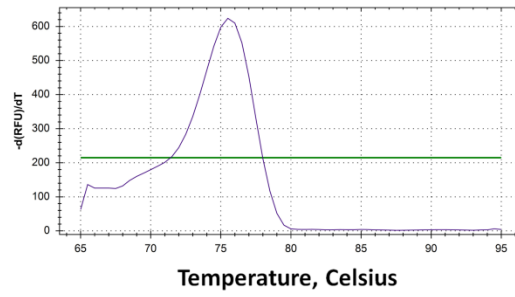

**miR-1246 mimics with PANC-1 cell lysate  
(0 hour incubate)  
Melt Peak**

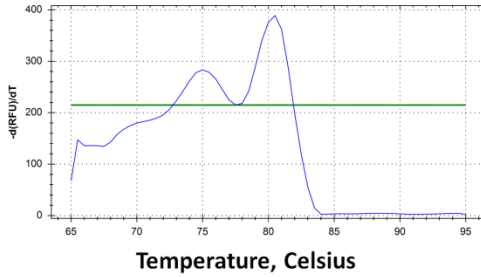

**miR-1246 mimics with PANC-1 cell lysate  
(4 hour incubate)  
Melt Peak**

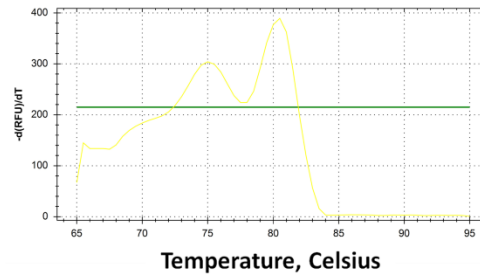

**miR-1246 mimics with PANC-1 cell lysate  
(12 hour incubate)  
Melt Peak**

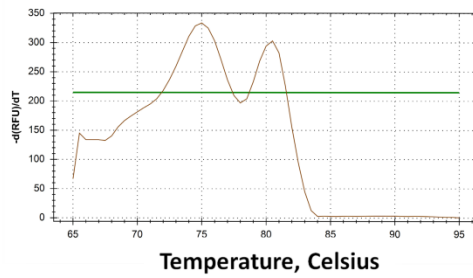

## Supplement Figure 2

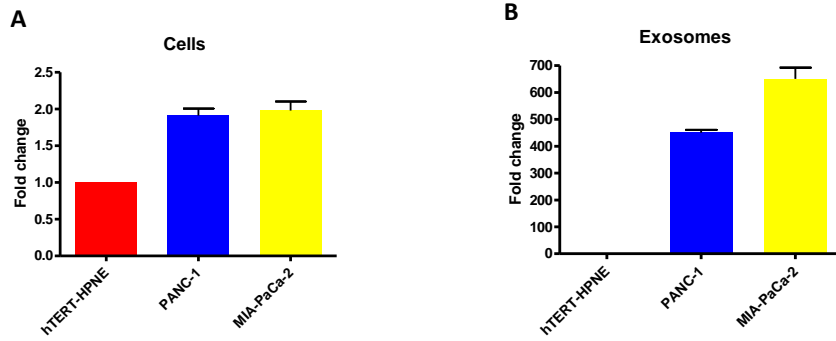

## Supplement Figure 3

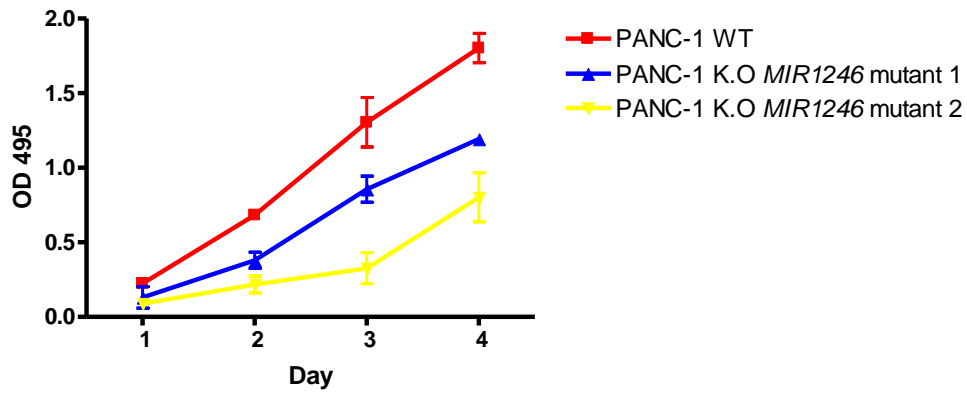

## Supplement Figure 4

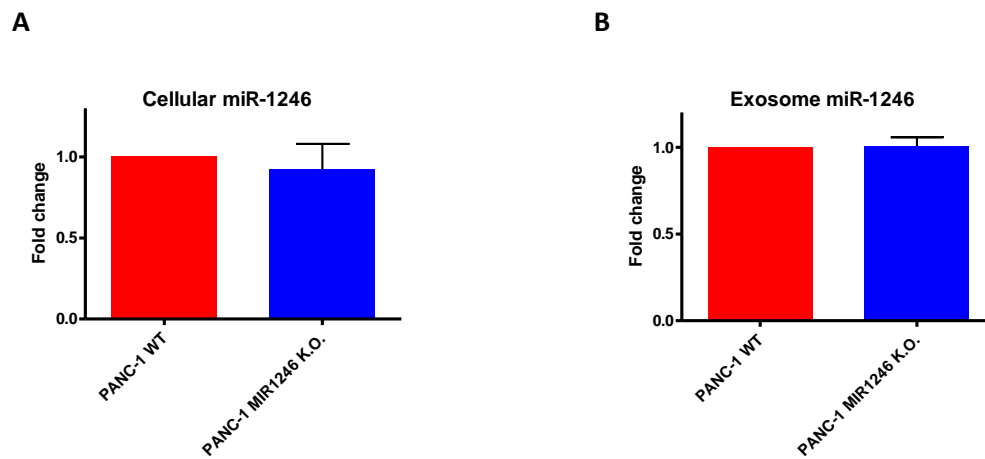

## Supplement Figure 5

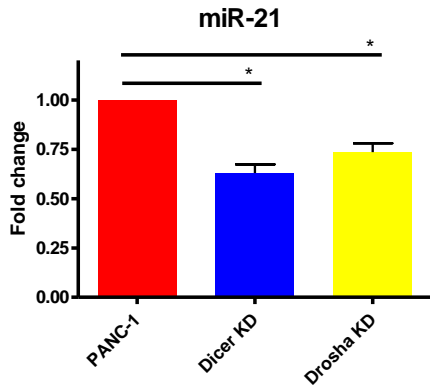

### Supplementary Figure legend

**Supplement Figure 1. Detection of miR-1246 mimics mixed with PANC-1 cell lysate.** miR-1246 mimics (Dharmacon™, Cat # C-301373-00) were incubated with PANC-1 cell lysate for 4 and 12 hours. RNA was isolated and qRT-PCR was performed using the poly A tailing method to analyze miR-1246 expression.

**Supplement Figure 2. Stem-loop TaqMan qRT-PCR analysis of miR-1246 expression.** cDNA was made from 10 ng of total RNA using the TaqMan miRNA Reverse Transcription Kit according to the manufacturer's instructions (Life Technologies). Real-Time PCR was performed by diluting the cDNA product in 2X TaqMan Universal Master Mix II (with UNG) and 20X TaqMan miRNA Expression Assay. RNU6B was served as a miRNA expression normalization control for cellular miR-1246 expression (**A**). A synthetic *Caenorhabditis elegans* miR-54 (cel-miR-54) RNA oligonucleotide (Integrated DNA Technologies) served as a spike-in control for expression normalization of exosome miRNA detection (**B**). Real-Time PCR was performed using the TaqMan microRNA assay (ID:001361, Life Technologies) with primers for miR-1246 (primer custom assay ID: CSQJA23), RNU6B (primer custom assay ID:001093) and Cel-miR-54, as we described (30) (means  $\pm$  SEM, n=3).

**Supplement Figure 3. Cell viability analysis of *MIR1246* knockout PANC-1 cells.** The MTS reagent (Pormega, Madison, WI, USA) was used to evaluate cell viability of wild type and *MIR1246* knockout PANC-1 cells. Cells were plated in 96 well plate at 5,000 per well. Viability was analyzed at 1, 2, 3, and 4 days post plating by incubating cells with MTS reagent for 1 hour and recording the readings at 495 nm.

**Supplement Figure 4. Stem-loop TaqMan qRT-PCR analysis of miR-1246 in *MIR1246* knockout PANC-1 cells and exosomes.** qRT-PCR detection of miR-1246 using the Stem-loop TaqMan method in wild type and *MIR1246* knockout PANC-1 cells (**A**). qRT-PCR detection of miR-1246 using the Stem-loop TaqMan method in exosomes derived from wild type and *MIR1246* knockout PANC-1 cells (**B**).

**Supplement Figure 5. Effects of knockdown of Drosha and Dicer on miR-21 expression in PANC-1 cells.** qRT-PCR (the poly A tailing method) was performed to analyze miR-21 expression in Dicer and Drosha knockdown PANC-1 cells (means  $\pm$  SEM, n=3). \* p<0.05, one way ANOVA.

### Supplement Table 1: RNU2-1 siRNA sequence

| siRNA name       | siRNA sequences                                      |
|------------------|------------------------------------------------------|
| hsRi.RNU2-1 13.1 | 5'-CUUAUCAGUUUAAUAUCU-3' / 5'-ACGUAUCAGAUUUAAAC-3'   |
| hsRi.RNU2-1 13.2 | 5'-GUAUCUGUUCUUAUCAGU-3' / 5'-AUUUAAACUGAUUAAAGAA-3' |

Alignment of Sequence\_1: [inserted GFP reference sequence.xdna] with Sequence\_2: [expected 3KB PCR production from miR1246 K.O mutant .xdna]

Similarity : 1006/2435 (41.31 %)

|       |     |                                                                |     |
|-------|-----|----------------------------------------------------------------|-----|
| Seq_1 | 1   | CACCAAAATCAACGGGACTTTCCAAAATGTCGTAACAACTCCGCCCCATTGACGCAAATG   | 60  |
| Seq_2 | 1   | -----AATCAACGGGACTTTCCAAAATGTCGTAACAACTCCGCCCCATTGACGCAAATG    | 54  |
| Seq_1 | 61  | GGCGGTAGGCGTGACGGTGGGAGGTCTATATAAGCAGAGCTGGTTTAGTGAACCGTCAG    | 120 |
| Seq_2 | 55  | GGCGGTAGGCGTGACGGTGGGAGGTCTATATAAGCAGAGCTGGTTTAGTGAACCGTCAG    | 114 |
| Seq_1 | 121 | ATCCGCTAGCGCTACCGGTCGCCACCATGGTGAGCAAGGGCGAGGAGCTGTTACCCGGGG   | 180 |
| Seq_2 | 115 | ATCCGCTAGCGCTACCGGTCGCCACCATGGTGAGCAAGGGCGAGGAGCTGTTACCCGGGG   | 174 |
| Seq_1 | 181 | TGGTGCCCATCCTGGTCGAGCTGGACGGCGACGTAAACGGCCACAAGTTCAGCGTGTCGG   | 240 |
| Seq_2 | 175 | TGGTGCCCATCCTGGTCGAGCTGGACGGCGACGTAAACGGCCACAAGTTCAGCGTGTCGG   | 234 |
| Seq_1 | 241 | GCGAGGGCGAGGGCGATGCCACCTACGGCAAGCTGACCCTGAAGTTCATCTGCACCACCG   | 300 |
| Seq_2 | 235 | GCGAGGGCGAGGGCGATGCCACCTACGGCAAGCTGACCCTGAAGTTCATCTGCACCACCG   | 294 |
| Seq_1 | 301 | GCAAGCTGCCCCGTGCCCTGGCCCACCCTCGTGACCACCCCTGACCTACGGCGTGCAAGTCT | 360 |
| Seq_2 | 295 | GCAAGCTGCCCCGTGCCCTGGCCCACCCTCGTGACCACCCCTGACCTACGGCGTGCAAGTCT | 354 |
| Seq_1 | 361 | TCAGCCGCTACCCCGACCACATGAAGCAGCAGACTTCTTCAAGTCCGCCATGCCCGAAG    | 420 |
| Seq_2 | 355 | TCAGCCGCTACCCCGACCACATGAAGCAGCAGACTTCTTCAAGTCCGCCATGCCCGAAG    | 414 |
| Seq_1 | 421 | GCTACGTCCAGGAGCGCACCATCTTCTTCAAGGACGACGGCAACTACAAGACCCGCGCCG   | 480 |
| Seq_2 | 415 | GCTACGTCCAGGAGCGCACCATCTTCTTCAAGGACGACGGCAACTACAAGACCCGCGCCG   | 474 |
| Seq_1 | 481 | AGGTGAAGTTCGAGGGCGACACCCCTGGTGAACCGCATCGAGCTGAAGGGCATCGACTTCA  | 540 |
| Seq_2 | 475 | AGGTGAAGTTCGAGGGCGACACCCCTGGTGAACCGCATCGAGCTGAAGGGCATCGACTTCA  | 534 |
| Seq_1 | 541 | AGGAGGACGGCAACATCCTGGGGCACAAGCTGGAGTACAACTACAACAGCCACAACGTCT   | 600 |
| Seq_2 | 535 | AGGAGGACGGCAACATCCTGGGGCACAAGCTGGAGTACAACTACAACAGCCACAACGTCT   | 594 |
| Seq_1 | 601 | ATATCATGGCCGACAAGCAGAAGAACGGCATCAAGGTGAACTTCAAGATCCGCCACAACA   | 660 |
| Seq_2 | 595 | ATATCATGGCCGACAAGCAGAAGAACGGCATCAAGGTGAACTTCAAGATCCGCCACAACA   | 654 |
| Seq_1 | 661 | TCGAGGACGGCAGCGTGACGCTCGCCGACCACTACCAGCAGAACACCCCCATCGGGCAGC   | 720 |
| Seq_2 | 655 | TCGAGGACGGCAGCGTGACGCTCGCCGACCACTACCAGCAGAACACCCCCATCGGGCAGC   | 714 |
| Seq_1 | 721 | GCCCCGTGCTGCTGCCCCGACAACCACTACCTGAGCACCCAGTCCGCCCTGAGCAAAGACC  | 780 |
| Seq_2 | 715 | GCCCCGTGCTGCTGCCCCGACAACCACTACCTGAGCACCCAGTCCGCCCTGAGCAAAGACC  | 774 |
| Seq_1 | 781 | CCAACGAGAAGCGCGATCACATGGTCCTGCTGGAGTTCGTGACCGCCGCCGGGATCACTC   | 840 |
| Seq_2 | 775 | CCAACGAGAAGCGCGATCACATGGTCCTGCTGGAGTTCGTGACCGCCGCCGGGATCACTC   | 834 |

|       |      |                                                               |      |
|-------|------|---------------------------------------------------------------|------|
| Seq_1 | 841  | TCGGCATGGACGAGCTGTACAAGTCCGGACTCAGATCTCGAGCTCAAGCTTCGAATTCTG  | 900  |
| Seq_2 | 835  | TCGGCATGGACGAGCTGTACAAGTCCGGACTCAGATCTCGAGCTCAAGCTTCGAATTCTG  | 894  |
| Seq_1 | 901  | CAGTCGACGGTACCGCGGGCCCGGGATCCACCGGATCTAGATAACTGATCATAATCAGCC  | 960  |
| Seq_2 | 895  | CAGTCGACGGTACCGCGGGCCCGGGATCCACCGGATCTAGATAACTGATCATAATCAGCC  | 954  |
| Seq_1 | 961  | ATACCACATTTGTAGAGGTTTACTTGCTTTAAAAAACCTCCCACACCTCCC-----      | 1012 |
| Seq_2 | 955  | ATACCACATTTGTAGAGGTTTACTTGCTTTAAAAAACCTCCCACACCTCCCCCAAATGC   | 1014 |
| Seq_1 | 1013 | -----                                                         | 1012 |
| Seq_2 | 1015 | AATGTCTCTTATCTCTGCCAGTCTACTTCATTGATGGTTCACATTACTAAGTTCCTT     | 1074 |
| Seq_1 | 1013 | -----                                                         | 1012 |
| Seq_2 | 1075 | GATGTGGATTATTTCTCCCTGTTAATTCTCTCGGTCTTAGAGTGACAATTGTACTTCCTTT | 1134 |
| Seq_1 | 1013 | -----                                                         | 1012 |
| Seq_2 | 1135 | AGCAATTAGAAAGCAGTGGTTTCCTGGGCTTGCTTCATCACCTCAAGCAAGCCTGTTAGC  | 1194 |
| Seq_1 | 1013 | -----                                                         | 1012 |
| Seq_2 | 1195 | TACTGCTCTTAGCAGGGGAAGTGGGAACATGACGAATGATGGCCATCTGCTCCAGGAATA  | 1254 |
| Seq_1 | 1013 | -----                                                         | 1012 |
| Seq_2 | 1255 | AACAAACTCTTCATTATTCCATTAGTGATTTTCCATTTCTGCTAAGCCTAACAAATTTAT  | 1314 |
| Seq_1 | 1013 | -----                                                         | 1012 |
| Seq_2 | 1315 | TAGCACTATTTAGGCTAATGTATGGCTGTATTATTTTACATAGTTACTTCATATTCCTCA  | 1374 |
| Seq_1 | 1013 | -----                                                         | 1012 |
| Seq_2 | 1375 | TGTGATGACATATTTAGGTGTTTCAGATCCTCTGTGTGGTTTTCTGCAGACAGAATTGGAT | 1434 |
| Seq_1 | 1013 | -----                                                         | 1012 |
| Seq_2 | 1435 | GAGTTTGAGAAGATAAAGTCTCCAGCACTGGTAAGACCACCATTAATTCCTCTTTGTGGA  | 1494 |
| Seq_1 | 1013 | -----                                                         | 1012 |
| Seq_2 | 1495 | GCAACTTTTCTCCAAGGATTTTAAAAGAAATGACCGCATGGCCATTGTGAATCAAATAGG  | 1554 |
| Seq_1 | 1013 | -----                                                         | 1012 |
| Seq_2 | 1555 | TTTGAAATGCAATGCATTAGGAGGAAACATTTATGTGTGCTTCTCAGTCACGCTACACTG  | 1614 |
| Seq_1 | 1013 | -----                                                         | 1012 |
| Seq_2 | 1615 | AACATAATTCCTTAGGGTTGTGTTGAAAGCAGCACTAGACAAGGCCCCAGGACCCCAATTT | 1674 |
| Seq_1 | 1013 | -----                                                         | 1012 |

|       |      |                                                                |      |
|-------|------|----------------------------------------------------------------|------|
| Seq_2 | 1675 | CCAGCCCTCTACTCTGTAGGGTTTTTATGAAAATCAGCAAAGGCATGTAGGTGATGACTC   | 1734 |
| Seq_1 | 1013 | -----                                                          | 1012 |
| Seq_2 | 1735 | TGAAAAAGTGACTCTTATCCAGACTCCTTTAAAAGAAACACCTTTATTGCAAGATCACAC   | 1794 |
| Seq_1 | 1013 | -----                                                          | 1012 |
| Seq_2 | 1795 | GTGGACTGGAATTGGAAGAAGAAAGCAAAGTCCCAGGGGATAGAGAACACTCTAGGTCTC   | 1854 |
| Seq_1 | 1013 | -----                                                          | 1012 |
| Seq_2 | 1855 | CTCTGGCCACCTCTCTCTCTCCTTTTCAGGTGACATGTTCTTGCTCCCATTTGTGTCTGTT  | 1914 |
| Seq_1 | 1013 | -----                                                          | 1012 |
| Seq_2 | 1915 | CTCTGTGACGTTGCTGTCCTCATTCAGAAAATGGTGGCCAAGAAGCCAAATACAGCCTGA   | 1974 |
| Seq_1 | 1013 | -----                                                          | 1012 |
| Seq_2 | 1975 | AGTTGTGCTTTATTTGGCCAGCTTAATATTTAGATCAAATTTTGAATTTGAATGTTTTTG   | 2034 |
| Seq_1 | 1013 | -----                                                          | 1012 |
| Seq_2 | 2035 | GCAAGGCATGTATTAATTTTGGCCACTTAGTTGCAAATCCGTACATTTACTTTTTTTCAG   | 2094 |
| Seq_1 | 1013 | -----                                                          | 1012 |
| Seq_2 | 2095 | ATGAAGGCATTC AAGTTTAAAACCACTTTATATATTTTCTCTACTTCC TTATCCTTATTC | 2154 |
| Seq_1 | 1013 | -----                                                          | 1012 |
| Seq_2 | 2155 | ATAGTTTTCGCTACTTCTTAACTTTCTATGACTTCACATGCTGTCCACCCATCTAATAAC   | 2214 |
| Seq_1 | 1013 | -----                                                          | 1012 |
| Seq_2 | 2215 | GTGCTCTGCTACAATTGTATGTCCTGTCACTGCTAACCTCAGTTGATCTGTTTATCTCC    | 2274 |
| Seq_1 | 1013 | -----                                                          | 1012 |
| Seq_2 | 2275 | ATTGACATTTCTGAGAAAGAACTGCTGTCCCATATGACATAATAGGTCATTTCCAAGAC    | 2334 |
| Seq_1 | 1013 | -----                                                          | 1012 |
| Seq_2 | 2335 | ATCACTACTGACATGTGTATTGTAAGTGGAAAAGTTGTAGGGTATCCATTATTATTATTG   | 2394 |
| Seq_1 | 1013 | -----                                                          | 1012 |
| Seq_2 | 2395 | TTATTCTTATGTGGTAGTATATATTAGGGCCATATAATAAC                      | 2435 |
